# Supplementary material for: Community Determinants of Physical Growth and Cognitive Development among Indian Children in Early Childhood: A Multivariate Multilevel Analysis
Source: MDPI journal article supplement (doi:10.3390/ijerph17010182), 2019-12-26
Supplement: s1 [file s1]

Table S1. Community-level characteristics from Indian data, Young Lives round 2, 2006

### **1. Local Pollution (n=14)**

#### ***Is this a problem in locality?***

##### **Water pollution**

Industrial waste deposited or dumped at (or in) water sources

Mining waste deposited or dumped at (or near) water sources

Local families garbage dumped at (or in) these water sources

Animal feces at (or in) water sources

##### **Land pollution**

Wasteland (non-regulated space) where firms dump garbage

Wasteland where local families dump garbage

Wasteland where families from other localities dump garbage

Animals' excrements on the streets (of the locality)

##### **Air pollution**

Garbage burning

Industrial activity

Trucks, cars, and the like passing by locality

Use of pesticides, fertilizers in local agricultural lands

##### **Other types of pollution**

Noise pollution (motor vehicles, airports, factories)

Standing water, open drains (with the consequent proliferation of mosquitoes, rats and other animals that threaten local population's health)

### **2. Local Social Problems (n=9)**

#### ***Is this a problem in locality?***

Theft / robbery

Cattle/livestock theft

Prostitution in the local area

Juvenile gangs

Local adult bands/groups rivalry (political, ethnic, economic-wise)

Illegal drugs selling in the local area

Drug-addicts in the local area (either residents or outsiders consuming illegal drugs in the local area)

Alcoholism

Violent crimes

### **3. Access to Local Services (n=26)**

#### ***Is the following service currently available at locality?***

Recreational areas: children's playgrounds

-space exclusively assigned for little children to play

(it might be an open field as long as it is clean and safe/secure)

Recreational areas: football (soccer) field, volleyball field, etc.

-space exclusively assigned for children and adolescents to exercise/practice a sport

(it might be an open field as long as it is clean and safe/secure)

Recreational areas: camping zones of family recreational areas

Movie theatre / public place for playing films

Video games

Cock fighting arenas / bull fighting arenas or other animal fighting arenas  
 Space for fairgrounds / circus (temporary recreational activities)  
 Slot machines / casino  
 Religious institutions, churches  
 Public telephones, community telephone, rural telephone.  
 Private telephone (at least one connection)  
 Public internet cabin  
 Electricity (at least one connection)  
 Drinking water (at least one connection)  
 Sewerage (at least one connection)  
 Police station  
 Non-professional judge  
 Professional judge  
 Nationalized banks  
 Other private banks  
 Local government credit/savings schemes  
 Primary agricultural cooperative societies  
 Anganwadi Center for Integrated Child Development Services (ICDS)  
 Regulated market  
 Fair price/ Public distribution system (PDS) shop  
 Veterinary hospital

---

#### **4. Local Programs Run by Government and NGO/Charity (n=60)**

***Does this program currently operate at locality?***

##### **Food assistance programs/employment generation programs**

National Mid-day meal scheme: school meal program run by the government of India  
 Public distribution system (PDS): Indian food security system  
 Antyodaya Anna Yojana (AAY): governmental foods subsidy scheme for the poorest  
 Annapurna Scheme: food security program for senior citizens

---

##### **Education programs**

Rural education scholarship  
 Free Text-Book  
 School feeding program (ICDS)  
 Free Transport and Free Tuition Fee programme  
 Education Guarantee Scheme under Sarva Shiksha Abhiyan (SSA)/Alternative School  
 Residential Schools run by Social Welfare departments

---

##### **Health programs**

Health insurance  
 Central Rural Sanitation Program (CRSP) (ISL)  
 Swajala dhara (Drinking Water)

---

##### **Infrastructure programs**

Soil & Water Conservation Program

---

##### **Other programs**

Food for work  
 Agricultural extension services  
 Widow pensions

National Family Benefit Scheme (NFBS)  
 National Maternity Benefit Scheme (NMBS)  
 Girl Child Protection Scheme  
 Indira Awas Yozana (IAY)  
 Credit Cum Subsidy Scheme for Rural Housing (CCSSRH)  
 National Old Age Pension Scheme (NOAP)  
 Sampoorna Grameena Rozgar Yozana (SGRY))  
 Swarnajayanti Gram Swarojgar yojana (SGSY)  
 Prime Minister's Rojgar Yojana (PMRY)  
 Pradhana Manthri Grameena Sadak Yojana  
 Development of Women and Child in Rural Areas (DWACRA/DPIP/RPRP) Groups  
 Joint Forest Management (JFM)  
 Farmers Clubs  
 Watershed Development Works  
 Watershed (DPAP)  
 Watershed (Others)  
 Desert Development Program  
 Waste Land Development Program  
 National Rural Employment Guarantee Scheme  
 National Project on Bio-gas development  
 Integrated Rural Energy Program  
 Integrated Cattle Development Program  
 Integrated Dairy Development Program  
 Fish Farmer Development Program  
 Crop Insurance  
 Agriculture input subsidy/crop production program  
 Deepam Padhakam  
 Land Distribution (CLDP / Indira Prabha)  
 Adarana  
 Subsidy on purchase of Agri. Machinery  
 Support of bonded and Child Labor  
 Free veterinary Camps  
 Cheyutha (for Disabled)  
 CM EY / Rajiv Yuva Shakti  
 Swadhar Programme (Child Trafficking)  
 Programmes of SC Corporation  
 Programmes of ST Corporation  
 Programmes of BC Corporation  
 Programmes of Minority Corporation  
 Kasturba Gandhi Balika Vidhhyalaya  
 National Child Labour Programme  
 Andhra Pradesh Special Police  
 APRLP

---

#### 5. Local Healthcare Resource (n=21)

*Is there currently \_\_\_\_\_ available in locality?*

**Health facility**

Public hospital

Private hospital

State run health center (PHC)  
Private clinic  
Public clinic (sub center)  
Health center (private)  
Pharmacy  
Family planning clinic (public)  
Family planning clinic (private)  
Private maternity home  
Health post

---

**Health workers**

---

Trained midwife  
Traditional birth attendant  
Traditional healer  
Curioso  
Village health worker  
Auxiliars/Technician nurses/Medical care assistant  
Trained nurse  
Social worker  
Mental health worker  
General physician  
Specialist physician (pediatrician, gynecologists, psychiatrist, etc.)  
Anesthetist  
Dentist  
Blood Banker

---

Table S2. The result of sensitivity analysis

|                                                        | HAZ         |       | WAZ         |       | PPVTZ       |      | MATHZ       |      |
|--------------------------------------------------------|-------------|-------|-------------|-------|-------------|------|-------------|------|
|                                                        | Coefficient | SE    | Coefficient | SE    | Coefficient | SE   | Coefficient | SE   |
| Local pollution problems                               | -0.001      | 0.02  | 0.02        | 0.02  | 0.01        | 0.03 | -0.04       | 0.03 |
| Local social problems                                  | -0.003      | 0.03  | -0.001      | 0.02  | 0.002       | 0.04 | -0.08*      | 0.04 |
| Access to local services                               | -0.004      | 0.01  | 0.002       | 0.01  | 0.01        | 0.01 | 0.004       | 0.01 |
| Local programs run by government and NGO/charity       | -0.001      | 0.004 | 0.0004      | 0.004 | 0.01*       | 0.01 | 0.02**      | 0.01 |
| Local healthcare resources                             | 0.04**      | 0.01  | 0.03*       | 0.01  | -0.02       | 0.02 | -0.01       | 0.02 |
| Age (in months)                                        | -0.02       | 0.02  | -0.08***    | 0.02  | 0.07***     | 0.02 | 0.11***     | 0.02 |
| Sex (reference: girls)                                 |             |       |             |       |             |      |             |      |
| Boys                                                   | -0.05       | 0.04  | -0.16***    | 0.04  | 0.27***     | 0.04 | 0.08*       | 0.04 |
| Ethnicity (reference: Backward castes)                 |             |       |             |       |             |      |             |      |
| Scheduled castes                                       | 0.004       | 0.06  | 0.07        | 0.06  | 0.08        | 0.06 | -0.02       | 0.06 |
| Scheduled tribes                                       | -0.13       | 0.08  | 0.08        | 0.08  | -0.10       | 0.09 | -0.28***    | 0.08 |
| Other categories                                       | 0.11        | 0.06  | 0.22***     | 0.06  | 0.02        | 0.06 | 0.01        | 0.06 |
| Caregiver's education (reference: no education)        |             |       |             |       |             |      |             |      |
| Primary or below                                       | 0.13*       | 0.05  | 0.08        | 0.05  | 0.17***     | 0.05 | 0.33***     | 0.05 |
| Post-secondary or above                                | 0.33*       | 0.14  | 0.44**      | 0.14  | 0.52***     | 0.13 | 0.66***     | 0.13 |
| Family structure (reference: living with both parents) |             |       |             |       |             |      |             |      |
| Living with single or no parent                        | -0.07       | 0.15  | -0.03       | 0.16  | 0.05        | 0.15 | 0.29*       | 0.14 |
| Birth order (reference: first)                         |             |       |             |       |             |      |             |      |
| Second                                                 | -0.12*      | 0.05  | -0.11*      | 0.05  | -0.09       | 0.05 | -0.04       | 0.05 |
| Third or greater                                       | -0.36***    | 0.06  | -0.37***    | 0.07  | -0.22***    | 0.06 | -0.22***    | 0.06 |
| Mother's age at birth (reference: 20 or below)         |             |       |             |       |             |      |             |      |
| 21-30                                                  | 0.20***     | 0.05  | 0.17***     | 0.05  | 0.19***     | 0.05 | 0.08        | 0.05 |
| 31 or above                                            | 0.37***     | 0.11  | 0.23*       | 0.11  | 0.14        | 0.10 | 0.14        | 0.10 |
| Mother's height                                        | 0.24***     | 0.02  | 0.16***     | 0.02  | -0.01       | 0.02 | 0.03        | 0.02 |
| Wealth index                                           | 0.18***     | 0.03  | 0.21***     | 0.03  | 0.18***     | 0.03 | 0.21***     | 0.03 |

Note: WAZ: weight-for-age z-score, PPVTZ: Peabody Picture Vocabulary Test z-score, \*p<0.05, \*\*p<0.01, \*\*\*p<0.001.
